# Supplementary material for: Construction of FeOOH modified CoMxOy (M = Mo, W, V) on nickel foam for highly efficient oxygen evolution reaction
Source: Royal Society of Chemistry journal article supplement (doi:10.1039/d2se01553f), 2023-01-01
Supplement: d2se01553f1.pdf [file d2se01553f1.pdf]

## Supporting Information

# **Construction of FeOOH modified CoM<sub>x</sub>O<sub>y</sub> (M = Mo, W, V) on Nickel Foam for Highly Efficient Oxygen Evolution Reaction**

Tingting Wen, Limin Wang\*, Yaqiong Gong\*

*School of Chemical Engineering and Technology, North University of China, Taiyuan,  
030051, P. R. China*

*\* Email: wanglimin@nuc.edu.cn (Limin Wang); gyq@nuc.edu.cn (Yaqiong Gong)*

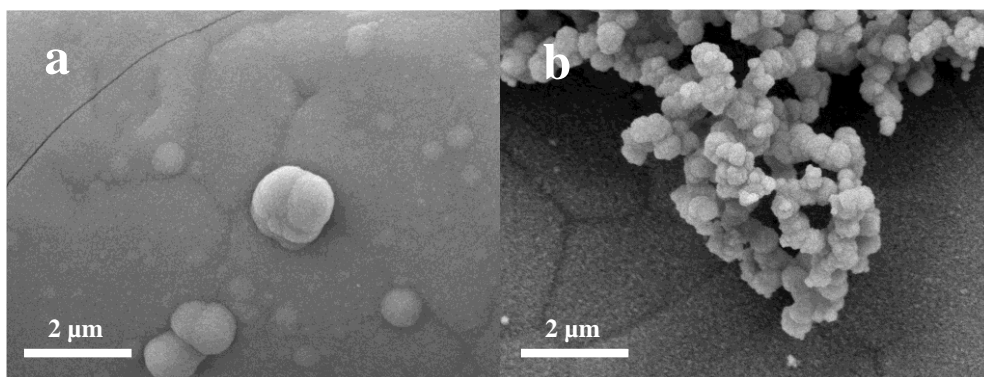

**Fig. S1** SEM images of  $\text{Co}_3(\text{VO}_4)_2/\text{NF}$  and  $\text{CoWO}_4/\text{NF}$ .

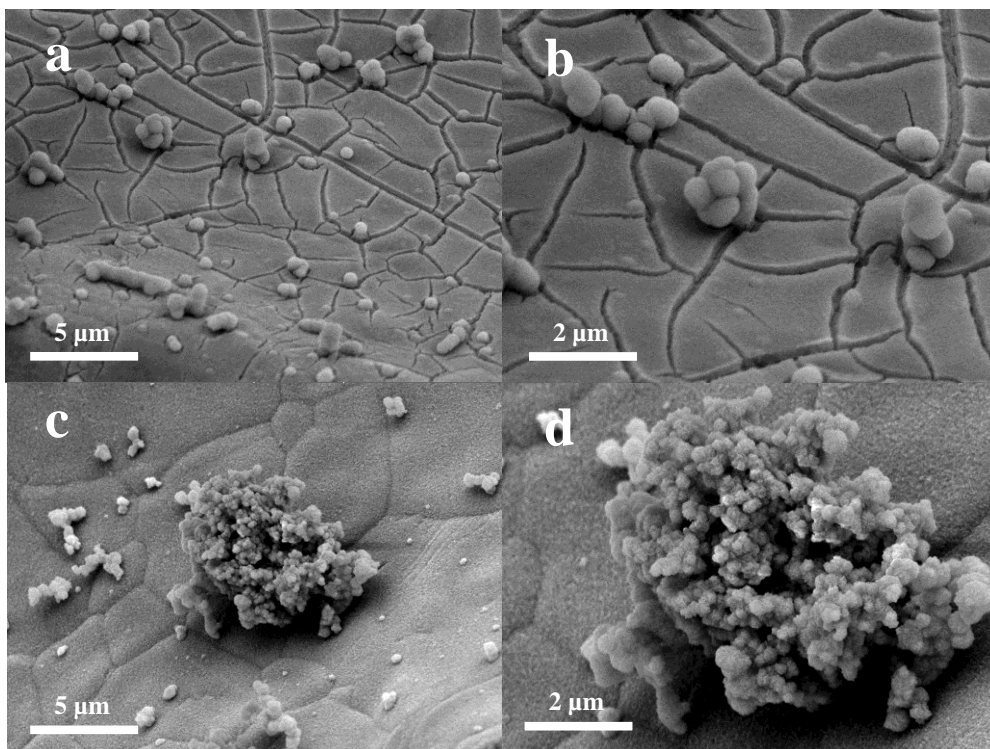

**Fig. S2** SEM images of (a and b)  $\text{FeOOH-Co}_3(\text{VO}_4)_2/\text{NF}$ , (c and d)  $\text{FeOOH-CoWO}_4/\text{NF}$ .

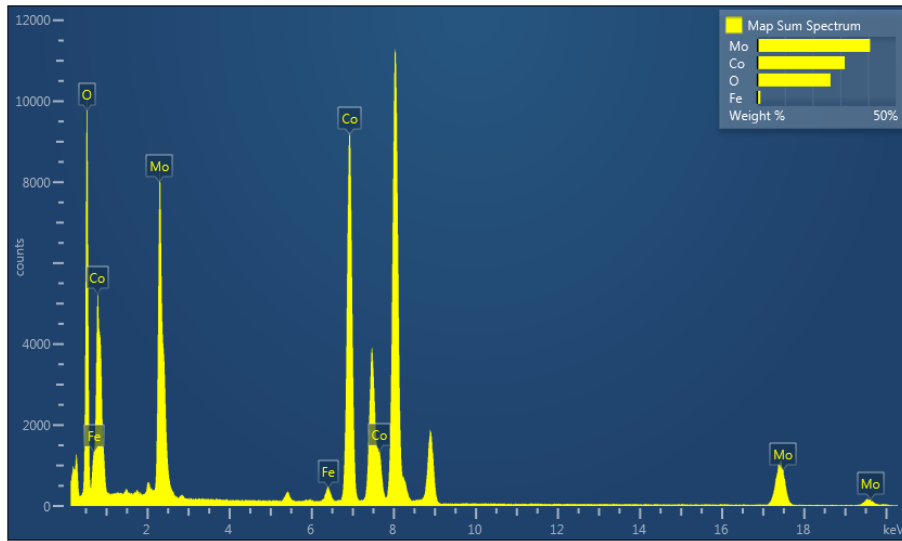

**Fig. S3** The element composition of FeOOH-CoMoO<sub>4</sub>/NF.

**Table S1** Elemental composition of Fe, Co, Mo and O

| <b>Element</b> | <b>Fe</b> | <b>Co</b> | <b>Mo</b> | <b>O</b> |
|----------------|-----------|-----------|-----------|----------|
| <b>Atom/%</b>  | 0.8       | 20.35     | 16.11     | 62.74    |

---

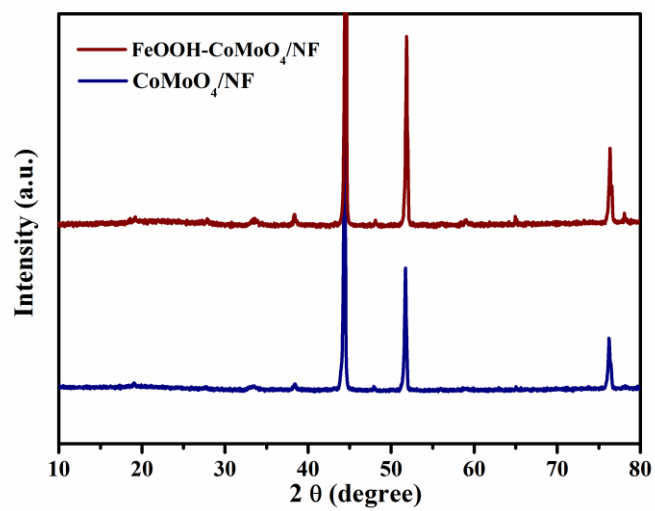

**Fig. S4** XRD patterns of FeOOH-CoMoO<sub>4</sub>/NF and CoMoO<sub>4</sub>/NF.

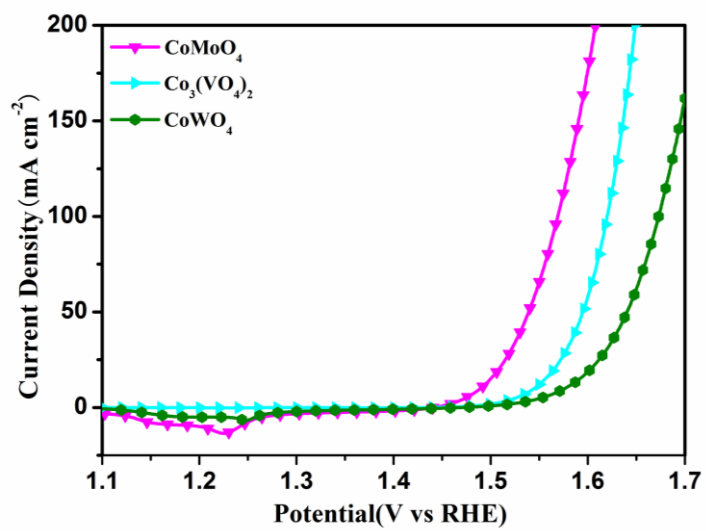

**Fig. S5** The LSV of CoMoO<sub>4</sub>/NF, Co<sub>3</sub>(VO<sub>4</sub>)<sub>2</sub>/NF, and CoWO<sub>4</sub>/NF.

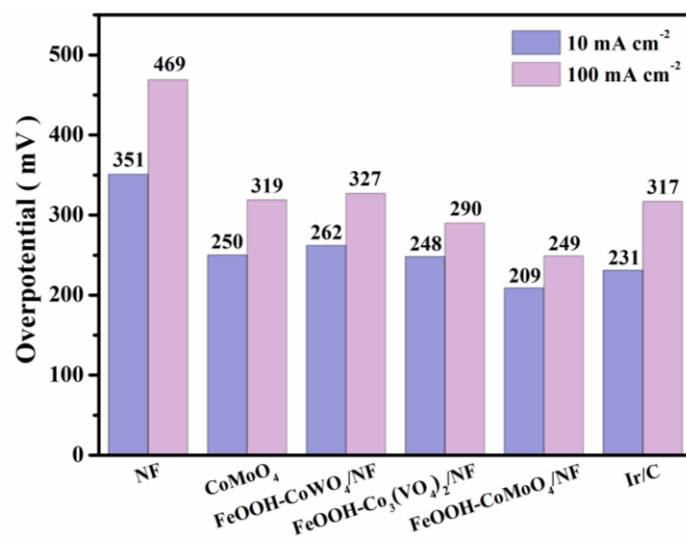

**Fig. S6** Comparison of overpotential required at 10 mA cm<sup>-2</sup> and 100 mA cm<sup>-2</sup>.



**Table S2** Comparison of OER activity between FeOOH-CoMoO<sub>4</sub>/NF and other recently reported non-noble metal catalysts in 1M KOH

| Catalyst                                              | $\eta_{10}$ (mV) | Reference                                       |
|-------------------------------------------------------|------------------|-------------------------------------------------|
| FeOOH-CoMoO <sub>4</sub> /NF                          | 218              | This work                                       |
| Ni-Fe LDH/CNT                                         | 247              | J. Am. Chem. Soc.<br>2013, 135, 8452-8455.      |
| CoO <sub>x</sub>                                      | 306              | Nano Energy<br>2018, 43, 110-116.               |
| $\alpha$ -NiFeO <sub>x</sub> H <sub>y</sub> @NF       | 239              | Nano Res.<br>2018, 11, 3959-3971.               |
| FeOOH@Co <sub>3</sub> O <sub>4</sub>                  | 228              | J. Colloid Interface Sci.<br>2022, 623, 617-626 |
| FeOOH/CoP                                             | 250              | Chem. Eng. J.<br>2022, 428, 131130.             |
| NiCo <sub>2</sub> O <sub>4</sub> ultrathin nanosheets | 320              | Angewandte Chemie<br>2015, 127, 7507-7512.      |
| CoNiN@NiFe-LDH                                        | 227              | Appl. Surf. Sci.<br>2021, 570, 151182.          |
| FeOOH-NiCoMo                                          | 265              | Adv. Mater.<br>2018, 30, 1803144.               |
| Co/NCP@NiCo LDHs                                      | 277              | J. Alloys Compd.<br>2022, 890, 161805.          |
| $\gamma$ -FeOOH NAs                                   | 286              | Adv. Mater.<br>2021, 33, 2005587.               |
| CoMnP nanoparticles                                   | 330              | J. Am. Chem. Soc.<br>2016, 138, 4006-4009.      |

**Table S3** Charge transfer resistance ( $R_{ct}$ ) values of different samples.

| Sample                                                    | $R_{ct}$ ( $\Omega$ ) |
|-----------------------------------------------------------|-----------------------|
| FeOOH-CoMoO <sub>4</sub> /NF                              | 1.521                 |
| FeOOH-Co <sub>3</sub> (VO <sub>4</sub> ) <sub>2</sub> /NF | 2.259                 |
| FeOOH-CoWO <sub>4</sub> /NF                               | 3.395                 |
| CoMoO <sub>4</sub> /NF                                    | 16.26                 |
| NF                                                        | 46.96                 |
| Ir/C                                                      | 5.37                  |

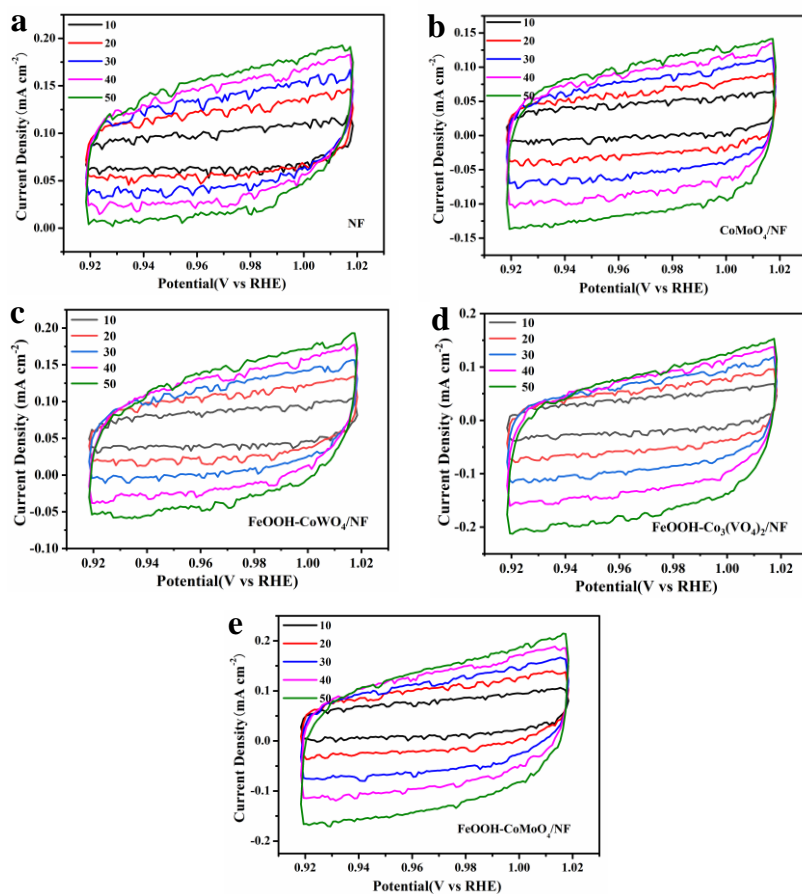

**Fig. S7** Cyclic voltammety curves of (a) NF, (b) CoMoO<sub>4</sub>/NF, (c) FeOOH-CoWO<sub>4</sub>/NF, (d) FeOOH-Co<sub>3</sub>(VO<sub>4</sub>)<sub>2</sub>/NF and (e) FeOOH-CoMoO<sub>4</sub>/NF.

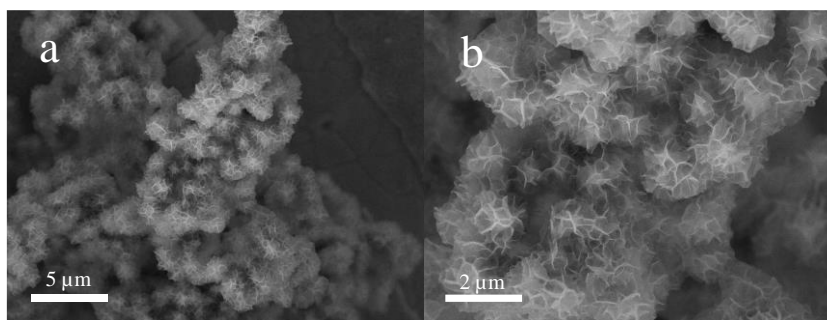

**Fig. S8** SEM images after the stability test of FeOOH-CoMoO<sub>4</sub>/NF.

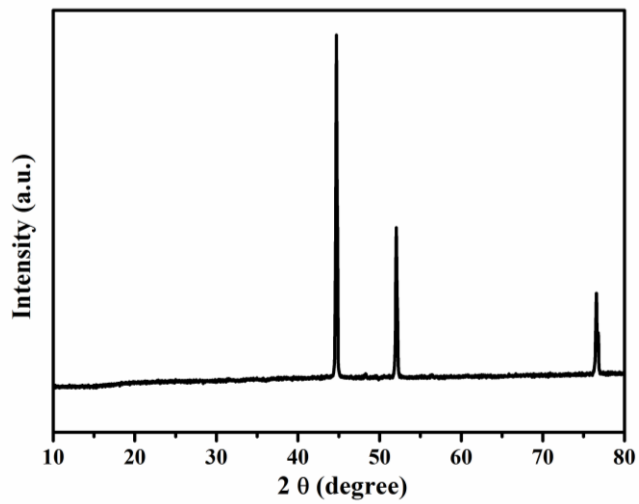

**Fig. S9** XRD pattern of FeOOH-CoMoO<sub>4</sub>/NF after OER stability test.

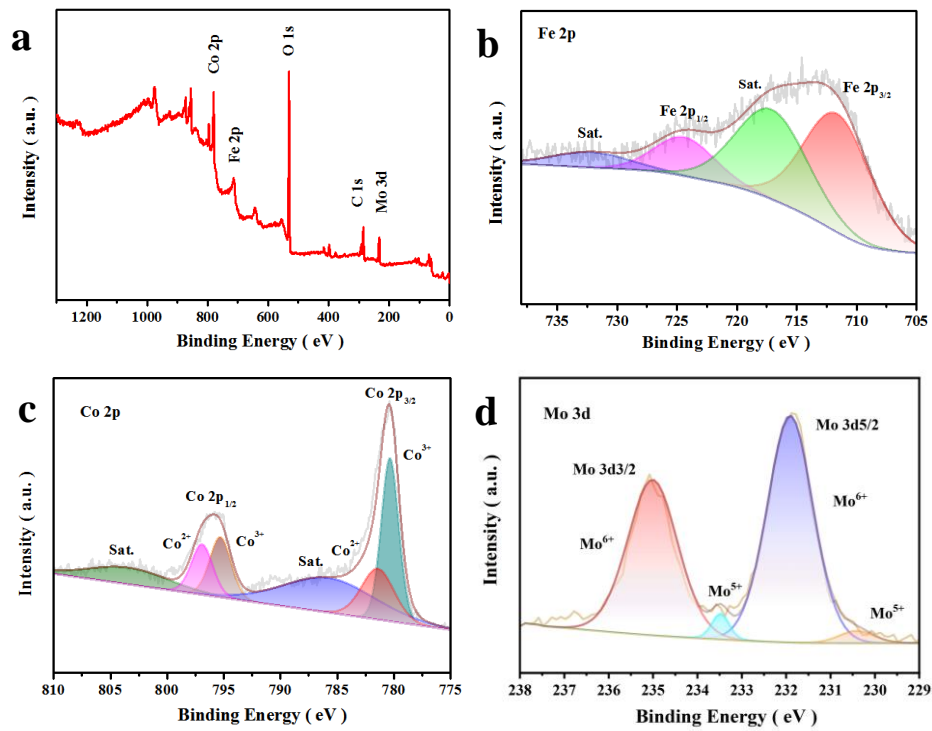

**Fig. S10** XPS spectra of FeOOH-CoMoO<sub>4</sub>/NF after OER stability test (a) survey, (b) Fe 2p, (c) Co 2p, (d) Mo 3d.
